# Supplementary material for: Rapid base-specific calling of SARS-CoV-2 variants of concern using combined RT-PCR melting curve screening and SIRPH technology
Source: bioRxiv or medRxiv preprint supplement (doi:10.1101/2021.03.15.21253586), 2021-03-17
Supplement: Supplementary file [file media-1.pdf]

**Supplementary Figure 1:** SIRPH Primer design for PCR (yellow) and SNUPE (green). Potentially mutated sites are marked in blue. Primer sequences are listed in Sup. Table 1.

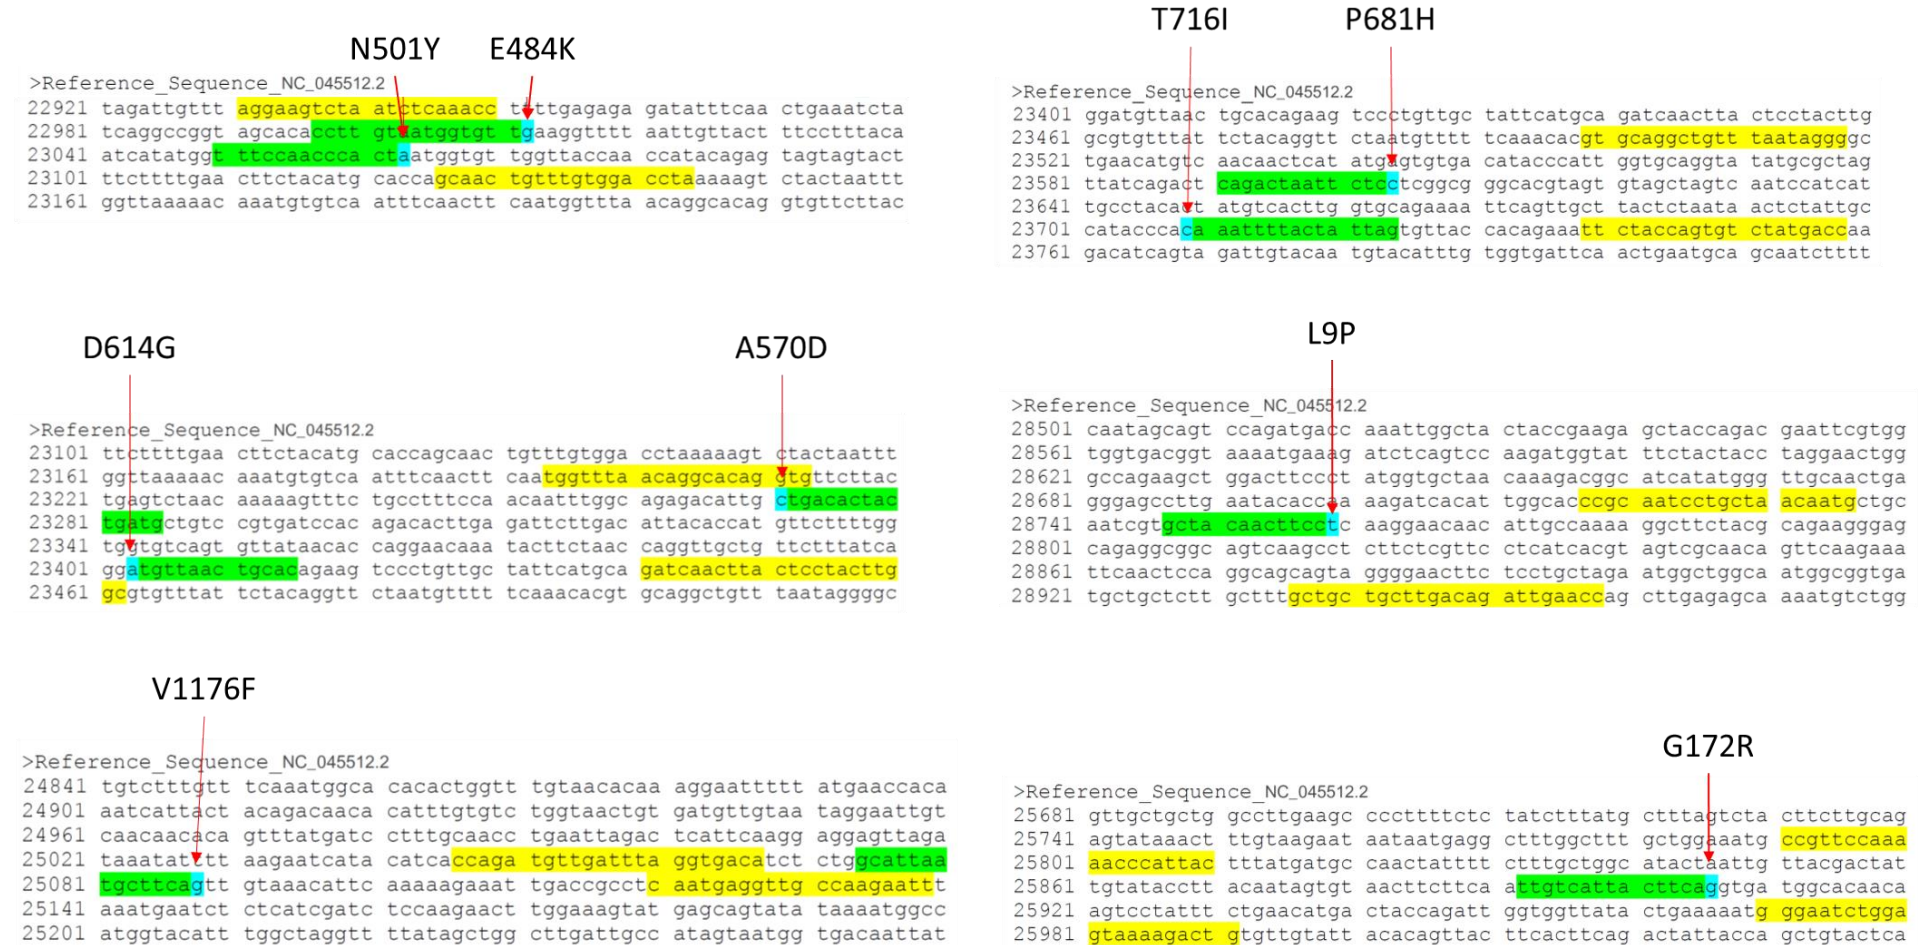

**Supplementary Figure 2:** Exemplary results of Sanger sequencing for potentially mutated sites L9P (marked in blue).

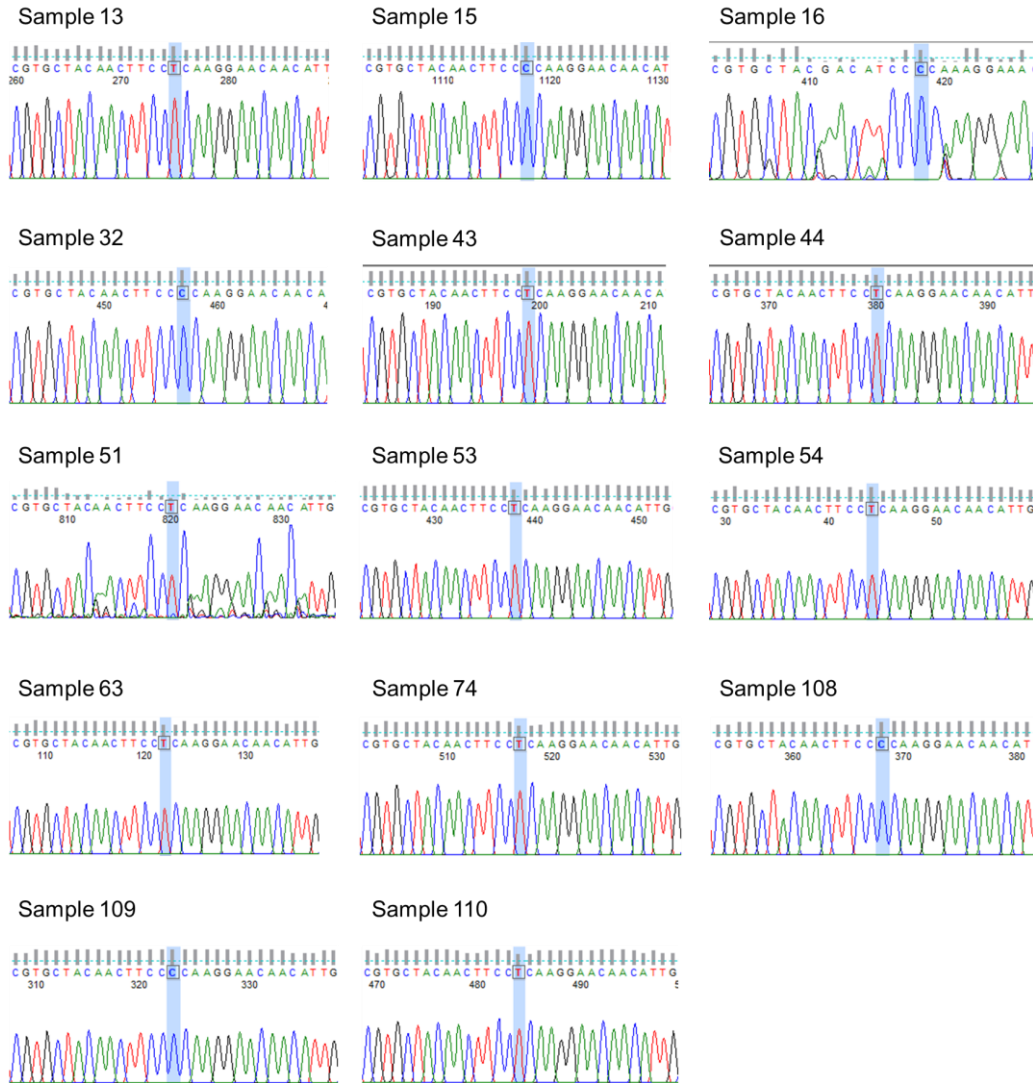

**Supplementary Table 1:** Primers for mutation screening via PCR and SNuPE. SNuPE primers are printed in bold.

|                      |                               |
|----------------------|-------------------------------|
| N501Y+E484K F        | 5'-AGGAAGTCTAATCTCAAACC-3'    |
| N501Y+E484K R        | 5'-TAGGTCCACAAACAGTTGC-3'     |
| <b>E484K nt23012</b> | <b>5'-CCTTGTAAATGGTGTT-3'</b> |
| <b>N501Y nt23063</b> | <b>5'-TTTCCAACCCACT-3'</b>    |
| A570D+D614G F        | 5'-TGGTTTAACAGGCACAGGTG-3'    |
| A570D+D614G R        | 5'-GCCAAGTAGGAGTAAGTTGATC-3'  |
| <b>A570D nt23271</b> | <b>5'-CATCAGTAGTGTCA-3'</b>   |
| <b>D614G nt23403</b> | <b>5'-GTGCAGTTAACA-3'</b>     |
| P681H+T716I F        | 5'-GTGCAGGCTGTTTAATAGGG-3'    |
| P681H+T716I R        | 5'-GGTCATAGACACTGGTAGAA-3'    |
| <b>P681H nt23604</b> | <b>5'-CAGACTAATTCTC-3'</b>    |
| <b>T716I nt23709</b> | <b>5'-CTAATAGTAAAATTT-3'</b>  |
| L9P F                | 5'-CCGCAATCCTGCTAACAATG-3'    |
| L9P R                | 5'-GGTTCAATCTGTCAAGCAGCAGC-3' |
| <b>L9P nt28759</b>   | <b>5'-GCTACAACCTCC-3'</b>     |
| G172R F              | 5'-CCGTTCCAAAAACCCATTAC-3'    |
| G172R R              | 5'-CAGTCTTTTACTCCAGATTCCC-3'  |
| <b>G172R nt25906</b> | <b>5'-TTGTCATTAATTCA-3'</b>   |

**Supplementary Table 2:** Acetonitril gradients for HPLC separation of SNUPE products.

|             |                             |
|-------------|-----------------------------|
| N501Y+E484K | 29-35% buffer B over 10 min |
| A570D       | 27-34% buffer B over 8 min  |
| D614G       | 27-32% buffer B over 8 min  |
| P681H+T716I | 28-35% buffer B over 13 min |
| L9P+G172R   | 27-38% buffer B over 12 min |

**Supplementary Table 3:** Artic multiplex PCR primers for SARS-CoV-2 genome sequencing adapted for Illumina. Low coverage regions were amplified in a separate pool (Pool 3) to obtain a more equal sequencing depth across the genome.

|             |                                                             |        |
|-------------|-------------------------------------------------------------|--------|
| COVID19_1_F | TCTTCCCTACACGACGCTCTCCGATCTACCAACCAACTTCGATCTCTTGT          | Pool 1 |
| COVID19_1_R | GTGACTGGAGTTCAGACGTGTGCTCTTCCGATCTCATCTTTAAGATGTTGACGTGCCTC | Pool 1 |
| COVID19_2_F | TCTTCCCTACACGACGCTCTCCGATCTCTGTTTTACAGGTCGCGACGT            | Pool 2 |
| COVID19_2_R | GTGACTGGAGTTCAGACGTGTGCTCTTCCGATCTTAAGGATCAGTGCCAAGCTCGT    | Pool 2 |
| COVID19_3_F | TCTTCCCTACACGACGCTCTCCGATCTCGGTAATAAAGGAGCTGGTGCC           | Pool 1 |
| COVID19_3_R | GTGACTGGAGTTCAGACGTGTGCTCTTCCGATCTAAGGTGTCTGCAATTCATAGCTCT  | Pool 1 |
| COVID19_4_F | TCTTCCCTACACGACGCTCTCCGATCTGGTGTATACTGCTGCCGTGAAC           | Pool 2 |
| COVID19_4_R | GTGACTGGAGTTCAGACGTGTGCTCTTCCGATCTCAACAAGTAGTGGCACCTTTAGT   | Pool 2 |
| COVID19_5_F | TCTTCCCTACACGACGCTCTCCGATCTTGGTGAACTTCATGGCAGACG            | Pool 1 |

|                  |                                                                |        |
|------------------|----------------------------------------------------------------|--------|
| COVID19_5_R      | GTGACTGGAGTTCAGACGTGTGCTCTTCCGATCTATTGATGTTGACTTTCTCTTTTTGGAGT | Pool 1 |
| COVID19_6_F      | TCTTTCCCTACACGACGCTCTTCCGATCTGGTGTGTTGGAGAAGGTTCCG             | Pool 2 |
| COVID19_6_R      | GTGACTGGAGTTCAGACGTGTGCTCTTCCGATCTTAGCGGCCTTCTGTAAAACACG       | Pool 2 |
| COVID19_7_F      | TCTTTCCCTACACGACGCTCTTCCGATCTATCAGAGGCTGCTCGTGTGTA             | Pool 1 |
| COVID19_7_F_alt0 | TCTTTCCCTACACGACGCTCTTCCGATCTCATTTGCATCAGAGGCTGCTCG            | Pool 1 |
| COVID19_7_R      | GTGACTGGAGTTCAGACGTGTGCTCTTCCGATCTTGACAGGTGACAATTTGTCCA        | Pool 1 |
| COVID19_7_R_alt5 | GTGACTGGAGTTCAGACGTGTGCTCTTCCGATCTAGGTGACAATTTGTCCACCGAC       | Pool 1 |
| COVID19_8_F      | TCTTTCCCTACACGACGCTCTTCCGATCTAGAGTTTCTTAGAGACGGTTGGGA          | Pool 3 |
| COVID19_8_R      | GTGACTGGAGTTCAGACGTGTGCTCTTCCGATCTGCTTCAACAGCTTCACTAGTAGGT     | Pool 3 |
| COVID19_9_F      | TCTTTCCCTACACGACGCTCTTCCGATCTTCCCACAGAAGTGTTAACAGAGGA          | Pool 1 |
| COVID19_9_F_alt4 | TCTTTCCCTACACGACGCTCTTCCGATCTTCCCACAGAAGTGTTAACAGAGG           | Pool 1 |
| COVID19_9_R      | GTGACTGGAGTTCAGACGTGTGCTCTTCCGATCTATGACAGCATCTGCCACAACAC       | Pool 1 |
| COVID19_9_R_alt2 | GTGACTGGAGTTCAGACGTGTGCTCTTCCGATCTGACAGCATCTGCCACAACACAG       | Pool 1 |
| COVID19_10_F     | TCTTTCCCTACACGACGCTCTTCCGATCTTGAGAAGTGCTCTGCCTATACAGT          | Pool 2 |
| COVID19_10_R     | GTGACTGGAGTTCAGACGTGTGCTCTTCCGATCTTCATCTAACCAATCTTCTTCTGCTCT   | Pool 2 |
| COVID19_11_F     | TCTTTCCCTACACGACGCTCTTCCGATCTGGAATTTGGTGCCACTTCTGCT            | Pool 1 |
| COVID19_11_R     | GTGACTGGAGTTCAGACGTGTGCTCTTCCGATCTTCATCAGATTCAACTTGCATGGCA     | Pool 1 |
| COVID19_12_F     | TCTTTCCCTACACGACGCTCTTCCGATCTAAACATGGAGGAGGTGTTGCAG            | Pool 2 |
| COVID19_12_R     | GTGACTGGAGTTCAGACGTGTGCTCTTCCGATCTTCACTCTTCATTTCCAAAAGCTTGA    | Pool 2 |
| COVID19_13_F     | TCTTTCCCTACACGACGCTCTTCCGATCTTCGCACAAATGTCTACTTAGCTGT          | Pool 1 |
| COVID19_13_R     | GTGACTGGAGTTCAGACGTGTGCTCTTCCGATCTACCACAGCAGTTAAAACACCCT       | Pool 1 |

|                   |                                                            |        |
|-------------------|------------------------------------------------------------|--------|
| COVID19_14_F      | TCTTCCCTACACGACGCTCTCCGATCTCATCCAGATTCTGCCACTCTTGT         | Pool 2 |
| COVID19_14_F_alt4 | TCTTCCCTACACGACGCTCTCCGATCTTGGCAATCTTCATCCAGATTCTGC        | Pool 2 |
| COVID19_14_R      | GTGACTGGAGTTCAGACGTGTGCTCTCCGATCTAGTTTCCACACAGACAGGCATT    | Pool 2 |
| COVID19_14_R_alt2 | GTGACTGGAGTTCAGACGTGTGCTCTCCGATCTTGGGTGTTTCTTCTGCATGTGC    | Pool 2 |
| COVID19_15_F      | TCTTCCCTACACGACGCTCTCCGATCTACAGTGCTTAAAAAGTGAAAAGTGCC      | Pool 1 |
| COVID19_15_F_alt1 | TCTTCCCTACACGACGCTCTCCGATCTAGTGCTTAAAAAGTGAAAAGTGCCT       | Pool 1 |
| COVID19_15_R      | GTGACTGGAGTTCAGACGTGTGCTCTCCGATCTAACAGAAACTGTAGCTGGCACT    | Pool 1 |
| COVID19_15_R_alt3 | GTGACTGGAGTTCAGACGTGTGCTCTCCGATCTACTGTAGCTGGCACTTTGAGAGA   | Pool 1 |
| COVID19_16_F      | TCTTCCCTACACGACGCTCTCCGATCTAATTTGGAAGAAGCTGCTCGGT          | Pool 2 |
| COVID19_16_R      | GTGACTGGAGTTCAGACGTGTGCTCTCCGATCTCACAACCTTGCCTGTGGAGGTTA   | Pool 2 |
| COVID19_17_F      | TCTTCCCTACACGACGCTCTCCGATCTCTTCTTTCTTTGAGAGAAGTGAGGACT     | Pool 1 |
| COVID19_17_R      | GTGACTGGAGTTCAGACGTGTGCTCTCCGATCTTTTGTGGAGTGTTAACAATGCAGT  | Pool 1 |
| COVID19_18_F      | TCTTCCCTACACGACGCTCTCCGATCTTGAAAATACCCACAAGTTAATGGTTAAC    | Pool 2 |
| COVID19_18_F_alt2 | TCTTCCCTACACGACGCTCTCCGATCTACTTCTATTAATGGGCAGATAACAACCTGT  | Pool 2 |
| COVID19_18_R      | GTGACTGGAGTTCAGACGTGTGCTCTCCGATCTAGCTTGTTTACCACACGTACAAGG  | Pool 2 |
| COVID19_18_R_alt1 | GTGACTGGAGTTCAGACGTGTGCTCTCCGATCTGCTTGTTTACCACACGTACAAGG   | Pool 2 |
| COVID19_19_F      | TCTTCCCTACACGACGCTCTCCGATCTGCTGTTATGTACATGGGCACACT         | Pool 1 |
| COVID19_19_R      | GTGACTGGAGTTCAGACGTGTGCTCTCCGATCTTGCCAACCTAGGGTCAATTTCTGT  | Pool 1 |
| COVID19_20_F      | TCTTCCCTACACGACGCTCTCCGATCTACAAAGAAAACAGTTACACAACAACCA     | Pool 2 |
| COVID19_20_R      | GTGACTGGAGTTCAGACGTGTGCTCTCCGATCTACGTGGCTTTATTAGTTGCATTGTT | Pool 2 |
| COVID19_21_F      | TCTTCCCTACACGACGCTCTCCGATCTTGGCTATTGATTATAAACACTACACACCC   | Pool 1 |

|                   |                                                                |        |
|-------------------|----------------------------------------------------------------|--------|
| COVID19_21_F_alt2 | TCTTCCCTACACGACGCTCTCCGATCTGGCTATTGATTATAAACACTACACACCCT       | Pool 1 |
| COVID19_21_R      | GTGACTGGAGTTCAGACGTGTGCTCTCCGATCTTAGATCTGTGTGGCCAACCTCT        | Pool 1 |
| COVID19_21_R_alt0 | GTGACTGGAGTTCAGACGTGTGCTCTCCGATCTGATCTGTGTGGCCAACCTCTTC        | Pool 1 |
| COVID19_22_F      | TCTTCCCTACACGACGCTCTCCGATCTACTACCGAAGTTGTAGGAGACATTATACT       | Pool 2 |
| COVID19_22_R      | GTGACTGGAGTTCAGACGTGTGCTCTCCGATCTACAGTATTCTTTGCTATAGTAGTCGGC   | Pool 2 |
| COVID19_23_F      | TCTTCCCTACACGACGCTCTCCGATCTACAACACTAACATAGTTACACGGTGT          | Pool 1 |
| COVID19_23_R      | GTGACTGGAGTTCAGACGTGTGCTCTCCGATCTACCAGTACAGTAGGTTGCAATAGTG     | Pool 1 |
| COVID19_24_F      | TCTTCCCTACACGACGCTCTCCGATCTAGGCATGCCTTCTTACTGTACTG             | Pool 2 |
| COVID19_24_R      | GTGACTGGAGTTCAGACGTGTGCTCTCCGATCTACATTCTAACCATAGCTGAAATCGGG    | Pool 2 |
| COVID19_25_F      | TCTTCCCTACACGACGCTCTCCGATCTGCAATTGTTTTTCAGCTATTTTGCAGT         | Pool 1 |
| COVID19_25_R      | GTGACTGGAGTTCAGACGTGTGCTCTCCGATCTACTGTAGTGACAAGTCTCTCGCA       | Pool 1 |
| COVID19_26_F      | TCTTCCCTACACGACGCTCTCCGATCTTTGTGATACATTCTGTGCTGGTAGT           | Pool 2 |
| COVID19_26_R      | GTGACTGGAGTTCAGACGTGTGCTCTCCGATCTCCGCACTATCACCAACATCAG         | Pool 2 |
| COVID19_27_F      | TCTTCCCTACACGACGCTCTCCGATCTACTACAGTCAGCTTATGTGTCAACC           | Pool 1 |
| COVID19_27_R      | GTGACTGGAGTTCAGACGTGTGCTCTCCGATCTAATACAAGCACCAAGGTCACGG        | Pool 1 |
| COVID19_28_F      | TCTTCCCTACACGACGCTCTCCGATCTACATAGAAGTACTGGCGATAGTTGT           | Pool 2 |
| COVID19_28_R      | GTGACTGGAGTTCAGACGTGTGCTCTCCGATCTTGTTTAGACATGACATGAACAGGTGT    | Pool 2 |
| COVID19_29_F      | TCTTCCCTACACGACGCTCTCCGATCTACTTGTGTTCCTTTTTGTGCTGC             | Pool 1 |
| COVID19_29_R      | GTGACTGGAGTTCAGACGTGTGCTCTCCGATCTAGTGTACTCTATAAGTTTTGATGGTGTGT | Pool 1 |
| COVID19_30_F      | TCTTCCCTACACGACGCTCTCCGATCTGCACAACATAATGGTGACTTTTTGCA          | Pool 2 |
| COVID19_30_R      | GTGACTGGAGTTCAGACGTGTGCTCTCCGATCTACCACTAGTAGATACACAAACACCAG    | Pool 2 |

|              |                                                                |        |
|--------------|----------------------------------------------------------------|--------|
| COVID19_31_F | TCTTCCCTACACGACGCTCTTCCGATCTTTCTGAGTACTGTAGGCACGGC             | Pool 1 |
| COVID19_31_R | GTGACTGGAGTTCAGACGTGTGCTCTTCCGATCTACAGAATAAACACCAGGTAAGAATGAGT | Pool 1 |
| COVID19_32_F | TCTTCCCTACACGACGCTCTTCCGATCTTGGTGAATACAGTCATGTAGTTGCC          | Pool 2 |
| COVID19_32_R | GTGACTGGAGTTCAGACGTGTGCTCTTCCGATCTAGCACATCACTACGCAACTTTAGA     | Pool 2 |
| COVID19_33_F | TCTTCCCTACACGACGCTCTTCCGATCTACTTTTGAAGAAGCTGCGCTGT             | Pool 1 |
| COVID19_33_R | GTGACTGGAGTTCAGACGTGTGCTCTTCCGATCTTGGACAGTAAACTACGTCATCAAGC    | Pool 1 |
| COVID19_34_F | TCTTCCCTACACGACGCTCTTCCGATCTTCCCATCTGGTAAAGTTGAGGGT            | Pool 2 |
| COVID19_34_R | GTGACTGGAGTTCAGACGTGTGCTCTTCCGATCTAGTGAAATTGGGCCTCATAGCA       | Pool 2 |
| COVID19_35_F | TCTTCCCTACACGACGCTCTTCCGATCTTGTTTCGCATTCAACCAGGACAG            | Pool 1 |
| COVID19_35_R | GTGACTGGAGTTCAGACGTGTGCTCTTCCGATCTACTTCATAGCCACAAGGTAAAGTCA    | Pool 1 |
| COVID19_36_F | TCTTCCCTACACGACGCTCTTCCGATCTTTAGCTTGGTTGTACGCTGCTG             | Pool 2 |
| COVID19_36_R | GTGACTGGAGTTCAGACGTGTGCTCTTCCGATCTGAACAAAGACCATTGAGTACTCTGGA   | Pool 2 |
| COVID19_37_F | TCTTCCCTACACGACGCTCTTCCGATCTACACACCACTGGTTGTTACTCAC            | Pool 1 |
| COVID19_37_R | GTGACTGGAGTTCAGACGTGTGCTCTTCCGATCTGTCCACACTCTCCTAGCACCAT       | Pool 1 |
| COVID19_38_F | TCTTCCCTACACGACGCTCTTCCGATCTACTGTGTTATGTATGCATCAGCTGT          | Pool 2 |
| COVID19_38_R | GTGACTGGAGTTCAGACGTGTGCTCTTCCGATCTCACCAAGAGTCAGTCTAAAGTAGCG    | Pool 2 |
| COVID19_39_F | TCTTCCCTACACGACGCTCTTCCGATCTAGTATTGCCCTATTTTCTTCATAACTGGT      | Pool 1 |
| COVID19_39_R | GTGACTGGAGTTCAGACGTGTGCTCTTCCGATCTTGTAAGTGGACACATTGAGCCC       | Pool 1 |
| COVID19_40_F | TCTTCCCTACACGACGCTCTTCCGATCTTGCACATCAGTAGTCTTACTCTCAGT         | Pool 2 |
| COVID19_40_R | GTGACTGGAGTTCAGACGTGTGCTCTTCCGATCTCATGGCTGCATCACGGTCAAAT       | Pool 2 |
| COVID19_41_F | TCTTCCCTACACGACGCTCTTCCGATCTGTTCCCTCCATCATATGCAGCT             | Pool 1 |



|                   |                                                                  |        |
|-------------------|------------------------------------------------------------------|--------|
| COVID19_41_R      | GTGACTGGAGTTCAGACGTGTGCTCTTCCGATCTTGGTATGACAACCATTAGTTTGGCT      | Pool 1 |
| COVID19_42_F      | TCTTTCCCTACACGACGCTCTTCCGATCTTGCAAGAGATGGTTGTGTTCCC              | Pool 2 |
| COVID19_42_R      | GTGACTGGAGTTCAGACGTGTGCTCTTCCGATCTCCTACCTCCCTTTGTTGTGTTGT        | Pool 2 |
| COVID19_43_F      | TCTTTCCCTACACGACGCTCTTCCGATCTTACGACAGATGTCTTGTGCTGC              | Pool 1 |
| COVID19_43_R      | GTGACTGGAGTTCAGACGTGTGCTCTTCCGATCTAGCAGCATCTACAGCAAAGCA          | Pool 1 |
| COVID19_44_F      | TCTTTCCCTACACGACGCTCTTCCGATCTTGCCACAGTACGTCTACAAGCT              | Pool 2 |
| COVID19_44_F_alt3 | TCTTTCCCTACACGACGCTCTTCCGATCTCCACAGTACGTCTACAAGCTGG              | Pool 2 |
| COVID19_44_R      | GTGACTGGAGTTCAGACGTGTGCTCTTCCGATCTAACCTTTCCACATACCGCAGAC         | Pool 2 |
| COVID19_44_R_alt0 | GTGACTGGAGTTCAGACGTGTGCTCTTCCGATCTCGCAGACGGTACAGACTGTGTT         | Pool 2 |
| COVID19_45_F      | TCTTTCCCTACACGACGCTCTTCCGATCTTACCTACAAC TTGTGCTAATGACCC          | Pool 1 |
| COVID19_45_F_alt2 | TCTTTCCCTACACGACGCTCTTCCGATCTAGTATGTACAAATACCTACAAC TTGTGCT      | Pool 1 |
| COVID19_45_R      | GTGACTGGAGTTCAGACGTGTGCTCTTCCGATCTAAATTGTTTCTTCATGTTGGTAGTTAGAGA | Pool 1 |
| COVID19_45_R_alt7 | GTGACTGGAGTTCAGACGTGTGCTCTTCCGATCTTTTCATGTTGGTAGTTAGAGAAAGTGTGTC | Pool 1 |
| COVID19_46_F      | TCTTTCCCTACACGACGCTCTTCCGATCTTGTCGCTTCCAAGAAAAGGACG              | Pool 2 |
| COVID19_46_F_alt1 | TCTTTCCCTACACGACGCTCTTCCGATCTCGCTTCCAAGAAAAGGACGAAGA             | Pool 2 |
| COVID19_46_R      | GTGACTGGAGTTCAGACGTGTGCTCTTCCGATCTCACGTTACCTAAGTTGGCGTA          | Pool 2 |
| COVID19_46_R_alt2 | GTGACTGGAGTTCAGACGTGTGCTCTTCCGATCTCACGTTACCTAAGTTGGCGTAT         | Pool 2 |
| COVID19_47_F      | TCTTTCCCTACACGACGCTCTTCCGATCTAGGACTGGTATGATTTTGTAGAAAACCC        | Pool 1 |
| COVID19_47_R      | GTGACTGGAGTTCAGACGTGTGCTCTTCCGATCTAATAACGGTCAAAGAGTTTAACTCTC     | Pool 1 |
| COVID19_48_F      | TCTTTCCCTACACGACGCTCTTCCGATCTTGTGACACTGACTTAACAAAGCCT            | Pool 2 |
| COVID19_48_R      | GTGACTGGAGTTCAGACGTGTGCTCTTCCGATCTTAGATTACCAGAAGCAGCGTGC         | Pool 2 |

|              |                                                                |        |
|--------------|----------------------------------------------------------------|--------|
| COVID19_49_F | TCTTCCCTACACGACGCTCTCCGATCTAGGAATTACTTGTGTATGCTGCTGA           | Pool 1 |
| COVID19_49_R | GTGACTGGAGTTCAGACGTGTGCTCTCCGATCTTGACGATGACTTGGTTAGCATTAAATACA | Pool 1 |
| COVID19_50_F | TCTTCCCTACACGACGCTCTCCGATCTGTTGATAAGTACTTTGATTGTTACGATGGT      | Pool 2 |
| COVID19_50_R | GTGACTGGAGTTCAGACGTGTGCTCTCCGATCTTAACATGTTGTGCCAACCA           | Pool 2 |
| COVID19_51_F | TCTTCCCTACACGACGCTCTCCGATCTTCAATAGCCGCCACTAGAGGAG              | Pool 1 |
| COVID19_51_R | GTGACTGGAGTTCAGACGTGTGCTCTCCGATCTAGTGCATTAACATTGGCCGTGA        | Pool 1 |
| COVID19_52_F | TCTTCCCTACACGACGCTCTCCGATCTCATCAGGAGATGCCACAACCTGC             | Pool 2 |
| COVID19_52_R | GTGACTGGAGTTCAGACGTGTGCTCTCCGATCTGTTGAGAGCAAATTCATGAGGTCC      | Pool 2 |
| COVID19_53_F | TCTTCCCTACACGACGCTCTCCGATCTAGCAAAATGTTGGACTGAGACTGA            | Pool 1 |
| COVID19_53_R | GTGACTGGAGTTCAGACGTGTGCTCTCCGATCTAGCCTCATAAACTCAGGTTCCC        | Pool 1 |
| COVID19_54_F | TCTTCCCTACACGACGCTCTCCGATCTTGAGTTAACAGGACACATGTTAGACA          | Pool 2 |
| COVID19_54_R | GTGACTGGAGTTCAGACGTGTGCTCTCCGATCTAACCAAAAACCTGTCCATTAGCACA     | Pool 2 |
| COVID19_55_F | TCTTCCCTACACGACGCTCTCCGATCTACTCAACTTTACTTAGGAGGTATGAGCT        | Pool 1 |
| COVID19_55_R | GTGACTGGAGTTCAGACGTGTGCTCTCCGATCTGGTGTACTCTCCTATTTGACTTTACTGT  | Pool 1 |
| COVID19_56_F | TCTTCCCTACACGACGCTCTCCGATCTACCTAGACCACCACTTAACCGA              | Pool 2 |
| COVID19_56_R | GTGACTGGAGTTCAGACGTGTGCTCTCCGATCTACACTATGCGAGCAGAAGGGTA        | Pool 2 |
| COVID19_57_F | TCTTCCCTACACGACGCTCTCCGATCTATTCTACACTCCAGGGACCACC              | Pool 1 |
| COVID19_57_R | GTGACTGGAGTTCAGACGTGTGCTCTCCGATCTGTAATTGAGCAGGGTCGCCAAT        | Pool 1 |
| COVID19_58_F | TCTTCCCTACACGACGCTCTCCGATCTTGATTTGAGTGTGTCAATGCCAGA            | Pool 2 |
| COVID19_58_R | GTGACTGGAGTTCAGACGTGTGCTCTCCGATCTCTTTTCTCCAAGCAGGGTTACGT       | Pool 2 |
| COVID19_59_F | TCTTCCCTACACGACGCTCTCCGATCTTCACGCATGATGTTTCATCTGCA             | Pool 1 |

|              |                                                                  |        |
|--------------|------------------------------------------------------------------|--------|
| COVID19_59_R | GTGACTGGAGTTCAGACGTGTGCTCTTCCGATCTAAGAGTCTGTACATTTTCAGCTTG       | Pool 1 |
| COVID19_60_F | TCTTTCCCTACACGACGCTCTTCCGATCTTGATAGAGACCTTTATGACAAGTTGCA         | Pool 2 |
| COVID19_60_R | GTGACTGGAGTTCAGACGTGTGCTCTTCCGATCTGGTACCAACAGCTTCTCTAGTAGC       | Pool 2 |
| COVID19_61_F | TCTTTCCCTACACGACGCTCTTCCGATCTTGTTTATCACCCGCGAAGAAGC              | Pool 1 |
| COVID19_61_R | GTGACTGGAGTTCAGACGTGTGCTCTTCCGATCTATCACATAGACAACAGGTGCGC         | Pool 1 |
| COVID19_62_F | TCTTTCCCTACACGACGCTCTTCCGATCTGGCACATGGCTTTGAGTTGACA              | Pool 2 |
| COVID19_62_R | GTGACTGGAGTTCAGACGTGTGCTCTTCCGATCTGTTGAACCTTTCTACAAGCCGC         | Pool 2 |
| COVID19_63_F | TCTTTCCCTACACGACGCTCTTCCGATCTTGTTAAGCGTGTGACTGGACT               | Pool 1 |
| COVID19_63_R | GTGACTGGAGTTCAGACGTGTGCTCTTCCGATCTACAAACTGCCACCATCACAACC         | Pool 1 |
| COVID19_64_F | TCTTTCCCTACACGACGCTCTTCCGATCTTCGATAGATATCCTGCTAATCCATTGT         | Pool 2 |
| COVID19_64_R | GTGACTGGAGTTCAGACGTGTGCTCTTCCGATCTAGTCTTGTAAGGTTCCAGAGGT         | Pool 2 |
| COVID19_65_F | TCTTTCCCTACACGACGCTCTTCCGATCTGCTGGCTTTAGCTTGTGGGTTT              | Pool 1 |
| COVID19_65_R | GTGACTGGAGTTCAGACGTGTGCTCTTCCGATCTTGTCAGTCATAGAACAAACACCAATAGT   | Pool 1 |
| COVID19_66_F | TCTTTCCCTACACGACGCTCTTCCGATCTGGGTGTGGACATTGCTGCTAAT              | Pool 2 |
| COVID19_66_R | GTGACTGGAGTTCAGACGTGTGCTCTTCCGATCTTCAATTTCCATTTGACTCCTGGGT       | Pool 2 |
| COVID19_67_F | TCTTTCCCTACACGACGCTCTTCCGATCTGTTGTCCAACAATTACCTGAACTTACT         | Pool 3 |
| COVID19_67_R | GTGACTGGAGTTCAGACGTGTGCTCTTCCGATCTCAACCTTAGAAACTACAGATAAACTTTGGG | Pool 3 |
| COVID19_68_F | TCTTTCCCTACACGACGCTCTTCCGATCTACAGGTTCACTAAGTGTGTGTGT             | Pool 2 |
| COVID19_68_R | GTGACTGGAGTTCAGACGTGTGCTCTTCCGATCTCTCCTTTATCAGAACCAGCACCA        | Pool 2 |
| COVID19_69_F | TCTTTCCCTACACGACGCTCTTCCGATCTTGTCGAAAAATACTCAACTGTGTCA           | Pool 1 |
| COVID19_69_R | GTGACTGGAGTTCAGACGTGTGCTCTTCCGATCTTCTTTATAGCCACGGAACCTCCA        | Pool 1 |

|                   |                                                               |        |
|-------------------|---------------------------------------------------------------|--------|
| COVID19_70_F      | TCTTTCCCTACACGACGCTCTTCCGATCTACAAAAGAAAATGACTCTAAAGAGGGTTT    | Pool 2 |
| COVID19_70_R      | GTGACTGGAGTTCAGACGTGTGCTCTTCCGATCTTGACCTTCTTTAAAGACATAACAGCAG | Pool 2 |
| COVID19_71_F      | TCTTTCCCTACACGACGCTCTTCCGATCTACAAATCCAATTCAGTTGTCTTCCATTTC    | Pool 1 |
| COVID19_71_R      | GTGACTGGAGTTCAGACGTGTGCTCTTCCGATCTTGAAAAGAAAGGTAAGAACAAGTCCT  | Pool 1 |
| COVID19_72_F      | TCTTTCCCTACACGACGCTCTTCCGATCTACACGTGGTGTATTACCCTGAC           | Pool 2 |
| COVID19_72_R      | GTGACTGGAGTTCAGACGTGTGCTCTTCCGATCTACTCTGAACTCACTTTCCATCCAAC   | Pool 2 |
| COVID19_73_F      | TCTTTCCCTACACGACGCTCTTCCGATCTCAATTTTGAATGATCCATTTTGGGTGT      | Pool 1 |
| COVID19_73_R      | GTGACTGGAGTTCAGACGTGTGCTCTTCCGATCTCACCAGCTGTCCAACCTGAAGA      | Pool 1 |
| COVID19_74_F      | TCTTTCCCTACACGACGCTCTTCCGATCTACATCACTAGGTTTCAAACCTTACTTGC     | Pool 3 |
| COVID19_74_R      | GTGACTGGAGTTCAGACGTGTGCTCTTCCGATCTGCAACACAGTTGCTGATTCTCTTC    | Pool 3 |
| COVID19_75_F      | TCTTTCCCTACACGACGCTCTTCCGATCTAGAGTCCAACCAACAGAATCTATTGT       | Pool 3 |
| COVID19_75_R      | GTGACTGGAGTTCAGACGTGTGCTCTTCCGATCTACCACCAACCTTAGAATCAAGATTGT  | Pool 3 |
| COVID19_76_F      | TCTTTCCCTACACGACGCTCTTCCGATCTAGGGCAAACCTGGAAAGATTGCT          | Pool 3 |
| COVID19_76_F_alt3 | TCTTTCCCTACACGACGCTCTTCCGATCTGGGCAAACCTGGAAAGATTGCTGA         | Pool 3 |
| COVID19_76_R      | GTGACTGGAGTTCAGACGTGTGCTCTTCCGATCTACACCTGTGCCTGTTAAACCAT      | Pool 3 |
| COVID19_76_R_alt0 | GTGACTGGAGTTCAGACGTGTGCTCTTCCGATCTACCTGTGCCTGTTAAACCATGA      | Pool 3 |
| COVID19_77_F      | TCTTTCCCTACACGACGCTCTTCCGATCTCCAGCAACTGTTTGTGGACCTA           | Pool 1 |
| COVID19_77_R      | GTGACTGGAGTTCAGACGTGTGCTCTTCCGATCTCAGCCCCTATTAACAGCCTGC       | Pool 1 |
| COVID19_78_F      | TCTTTCCCTACACGACGCTCTTCCGATCTCAACTTACTCCTACTTGGCGTGT          | Pool 2 |
| COVID19_78_R      | GTGACTGGAGTTCAGACGTGTGCTCTTCCGATCTTGTGTACAAAACCTGCCATATTGCA   | Pool 2 |
| COVID19_79_F      | TCTTTCCCTACACGACGCTCTTCCGATCTGTGGTGATTCAACTGAATGCAGC          | Pool 1 |

|                   |                                                              |        |
|-------------------|--------------------------------------------------------------|--------|
| COVID19_79_R      | GTGACTGGAGTTCAGACGTGTGCTCTTCCGATCTCATTTTCATCTGTGAGCAAAGGTGG  | Pool 1 |
| COVID19_80_F      | TCTTTCCCTACACGACGCTCTTCCGATCTTTGCCTTGGTGATATTGCTGCT          | Pool 2 |
| COVID19_80_R      | GTGACTGGAGTTCAGACGTGTGCTCTTCCGATCTTGGAGCTAAGTTGTTTAAACAAGCG  | Pool 2 |
| COVID19_81_F      | TCTTTCCCTACACGACGCTCTTCCGATCTGCAC TTGGAAA CTTC AAGATGTGG     | Pool 1 |
| COVID19_81_R      | GTGACTGGAGTTCAGACGTGTGCTCTTCCGATCTGTGAAGTTCTTTTCTTGTGCAGGG   | Pool 1 |
| COVID19_82_F      | TCTTTCCCTACACGACGCTCTTCCGATCTGGGCTATCATCTTATGTCCTTCCCT       | Pool 2 |
| COVID19_82_R      | GTGACTGGAGTTCAGACGTGTGCTCTTCCGATCTTGCCAGAGATGTCACCTAAATCAA   | Pool 2 |
| COVID19_83_F      | TCTTTCCCTACACGACGCTCTTCCGATCTTCC TTTGCAACCTGAATTAGACTCA      | Pool 1 |
| COVID19_83_R      | GTGACTGGAGTTCAGACGTGTGCTCTTCCGATCTTTTGACTCCTTTGAGCACTGGC     | Pool 1 |
| COVID19_84_F      | TCTTTCCCTACACGACGCTCTTCCGATCTTGCTGTAGTTGTCTCAAGGGCT          | Pool 2 |
| COVID19_84_R      | GTGACTGGAGTTCAGACGTGTGCTCTTCCGATCTAGGTGTGAGTAACTGTTACAAACAAC | Pool 2 |
| COVID19_85_F      | TCTTTCCCTACACGACGCTCTTCCGATCTACTAGCACTCTCCAAGGGTGTT          | Pool 1 |
| COVID19_85_R      | GTGACTGGAGTTCAGACGTGTGCTCTTCCGATCTACACAGCTTTTACTCCAGATTCCC   | Pool 1 |
| COVID19_86_F      | TCTTTCCCTACACGACGCTCTTCCGATCTTCAGGTGATGGCACAACAAGTC          | Pool 2 |
| COVID19_86_R      | GTGACTGGAGTTCAGACGTGTGCTCTTCCGATCTACGAAAGCAAGAAAAGAAGTACGC   | Pool 2 |
| COVID19_87_F      | TCTTTCCCTACACGACGCTCTTCCGATCTCGACTACTAGCGTGCCTTTGTA          | Pool 1 |
| COVID19_87_R      | GTGACTGGAGTTCAGACGTGTGCTCTTCCGATCTACTAGGTTCCATTGTTCAAGGAGC   | Pool 1 |
| COVID19_88_F      | TCTTTCCCTACACGACGCTCTTCCGATCTCCATGGCAGATTCCAACGGTAC          | Pool 2 |
| COVID19_88_R      | GTGACTGGAGTTCAGACGTGTGCTCTTCCGATCTTGGTCAGAATAGTGCCATGGAGT    | Pool 2 |
| COVID19_89_F      | TCTTTCCCTACACGACGCTCTTCCGATCTGTACGCGTTCCATGTGGTCATT          | Pool 1 |
| COVID19_89_F_alt2 | TCTTTCCCTACACGACGCTCTTCCGATCTCGCGTTCCATGTGGTCATTCAA          | Pool 1 |

|                   |                                                                  |        |
|-------------------|------------------------------------------------------------------|--------|
| COVID19_89_R      | GTGACTGGAGTTCAGACGTGTGCTCTTCCGATCTACCTGAAAGTCAACGAGATGAAACA      | Pool 1 |
| COVID19_89_R_alt4 | GTGACTGGAGTTCAGACGTGTGCTCTTCCGATCTACGAGATGAAACATCTGTTGTCACT      | Pool 1 |
| COVID19_90_F      | TCTTCCCTACACGACGCTCTTCCGATCTACACAGACCATCCAGTAGCAGT               | Pool 2 |
| COVID19_90_R      | GTGACTGGAGTTCAGACGTGTGCTCTTCCGATCTTGAAATGGTGAATTGCCCTCGT         | Pool 2 |
| COVID19_91_F      | TCTTCCCTACACGACGCTCTTCCGATCTTCACTACCAAGAGTGTGTTAGAGGT            | Pool 1 |
| COVID19_91_R      | GTGACTGGAGTTCAGACGTGTGCTCTTCCGATCTTTCAAGTGAGAACCAAAAGATAATAAGCA  | Pool 1 |
| COVID19_92_F      | TCTTCCCTACACGACGCTCTTCCGATCTTTGTGCTTTTTAGCCTTTCTGCT              | Pool 2 |
| COVID19_92_R      | GTGACTGGAGTTCAGACGTGTGCTCTTCCGATCTAGGTTCTGGCAATTAATTGTAAAAGG     | Pool 2 |
| COVID19_93_F      | TCTTCCCTACACGACGCTCTTCCGATCTTGAGGCTGGTTCTAAATCACCCA              | Pool 1 |
| COVID19_93_R      | GTGACTGGAGTTCAGACGTGTGCTCTTCCGATCTAGGCTTCTCCTTGCCATGTTGAG        | Pool 1 |
| COVID19_94_F      | TCTTCCCTACACGACGCTCTTCCGATCTGGCCCCAAGGTTTACCCAATAA               | Pool 2 |
| COVID19_94_R      | GTGACTGGAGTTCAGACGTGTGCTCTTCCGATCTTTTGCAATGTTGTTCTTGAGG          | Pool 2 |
| COVID19_95_F      | TCTTCCCTACACGACGCTCTTCCGATCTTGAGGGAGCCTTGAATACACCA               | Pool 1 |
| COVID19_95_R      | GTGACTGGAGTTCAGACGTGTGCTCTTCCGATCTCAGTACGTTTTTGCCGAGGCTT         | Pool 1 |
| COVID19_96_F      | TCTTCCCTACACGACGCTCTTCCGATCTGCCAACAAACAAGGCCAAAC                 | Pool 2 |
| COVID19_96_R      | GTGACTGGAGTTCAGACGTGTGCTCTTCCGATCTTAGGCTCTGTTGGTGGGAATGT         | Pool 2 |
| COVID19_97_F      | TCTTCCCTACACGACGCTCTTCCGATCTTGATGACAAAGATCCAAATTTCAAAGA          | Pool 1 |
| COVID19_97_R      | GTGACTGGAGTTCAGACGTGTGCTCTTCCGATCTACACACTGATTAAGATTGCTATGTGAG    | Pool 1 |
| COVID19_98_F      | TCTTCCCTACACGACGCTCTTCCGATCTAACAATTGCAACAATCCATGAGCA             | Pool 2 |
| COVID19_98_R      | GTGACTGGAGTTCAGACGTGTGCTCTTCCGATCTTCTCCTAAGAAGCTATTAATAATCACATGG | Pool 2 |

**Supplementary Table 4:** Genotype at potentially mutated sites L9P, G172R, E484K, N501Y, A570D, D614G, P681H, and T716I determined by SIRPH analysis (SNuPE) and whole viral genome sequencing (Seq.). In sequencing data regions with coverage less than 20 were excluded (NA) from the analysis.

| ID | SNuPE   | SNuPE   | SNuPE  | SNuPE  | SNuPE  | SNuPE   | SNuPE  | SNuPE  | Seq.   | Seq.    | Seq.   | Seq.   | Seq.   | Seq.    | Seq.   | Seq.   |
|----|---------|---------|--------|--------|--------|---------|--------|--------|--------|---------|--------|--------|--------|---------|--------|--------|
|    | L9P     | G172R   | E484K  | N501Y  | A570D  | D614G   | P681H  | T716I  | L9P    | G172R   | E484K  | N501Y  | A570D  | D614G   | P681H  | T716I  |
| 2  | T (WT)  | G (WT)  | G (WT) | A (WT) | C (WT) | G (Mut) | C (WT) | C (WT) | T (WT) | G (WT)  | G (WT) | A (WT) | C (WT) | G (Mut) | C (WT) | C (WT) |
| 3  | T (WT)  | G (WT)  | G (WT) | A (WT) | C (WT) | G (Mut) | C (WT) | C (WT) | T (WT) | G (WT)  | G (WT) | A (WT) | C (WT) | G (Mut) | C (WT) | C (WT) |
| 4  | T (WT)  | G (WT)  | G (WT) | A (WT) | C (WT) | G (Mut) | C (WT) | C (WT) | T (WT) | G (WT)  | NA     | NA     | C (WT) | G (Mut) | C (WT) | C (WT) |
| 5  | T (WT)  | G (WT)  | G (WT) | A (WT) | C (WT) | G (Mut) | C (WT) | C (WT) | T (WT) | G (WT)  | G (WT) | A (WT) | C (WT) | G (Mut) | C (WT) | C (WT) |
| 6  | T (WT)  | C (Mut) | G (WT) | A (WT) | C (WT) | G (Mut) | C (WT) | C (WT) | T (WT) | C (Mut) | G (WT) | A (WT) | C (WT) | G (Mut) | C (WT) | C (WT) |
| 7  | T (WT)  | G (WT)  | G (WT) | A (WT) | C (WT) | G (Mut) | C (WT) | C (WT) | T (WT) | G (WT)  | NA     | NA     | C (WT) | G (Mut) | C (WT) | C (WT) |
| 8  | T (WT)  | C (Mut) | G (WT) | A (WT) | C (WT) | G (Mut) | C (WT) | C (WT) | T (WT) | C (Mut) | G (WT) | A (WT) | C (WT) | G (Mut) | C (WT) | C (WT) |
| 9  | T (WT)  | G (WT)  | G (WT) | A (WT) | C (WT) | G (Mut) | C (WT) | C (WT) | T (WT) | G (WT)  | G (WT) | NA     | C (WT) | G (Mut) | C (WT) | C (WT) |
| 10 | T (WT)  | C (Mut) | G (WT) | A (WT) | C (WT) | G (Mut) | C (WT) | C (WT) | T (WT) | C (Mut) | G (WT) | A (WT) | C (WT) | G (Mut) | C (WT) | C (WT) |
| 11 | T (WT)  | G (WT)  | G (WT) | A (WT) | C (WT) | G (Mut) | C (WT) | C (WT) | T (WT) | G (WT)  | G (WT) | A (WT) | C (WT) | G (Mut) | C (WT) | C (WT) |
| 12 | T (WT)  | C (Mut) | G (WT) | A (WT) | C (WT) | G (Mut) | C (WT) | C (WT) | T (WT) | NA      | G (WT) | A (WT) | C (WT) | G (Mut) | C (WT) | C (WT) |
| 13 | T (WT)  | G (WT)  | G (WT) | A (WT) | C (WT) | G (Mut) | C (WT) | C (WT) | T (WT) | G (WT)  | G (WT) | A (WT) | C (WT) | G (Mut) | C (WT) | C (WT) |
| 14 | T (WT)  | C (Mut) | G (WT) | A (WT) | C (WT) | G (Mut) | C (WT) | C (WT) | T (WT) | NA      | G (WT) | A (WT) | C (WT) | G (Mut) | C (WT) | C (WT) |
| 15 | C (Mut) | G (WT)  | G (WT) | A (WT) | C (WT) | G (Mut) | C (WT) | C (WT) | NA     | G (WT)  | G (WT) | A (WT) | C (WT) | G (Mut) | C (WT) | C (WT) |
| 16 | C (Mut) | G (WT)  | G (WT) | A (WT) | C (WT) | G (Mut) | C (WT) | C (WT) | NA     | G (WT)  | G (WT) | A (WT) | C (WT) | G (Mut) | C (WT) | C (WT) |
| 17 | T (WT)  | G (WT)  | G (WT) | A (WT) | C (WT) | G (Mut) | C (WT) | C (WT) | T (WT) | G (WT)  | G (WT) | A (WT) | C (WT) | G (Mut) | C (WT) | C (WT) |









|     |        |        |        |        |        |         |        |        |        |        |    |    |        |         |        |        |
|-----|--------|--------|--------|--------|--------|---------|--------|--------|--------|--------|----|----|--------|---------|--------|--------|
| 112 | T (WT) | G (WT) | G (WT) | A (WT) | C (WT) | G (Mut) | C (WT) | C (WT) | T (WT) | G (WT) | NA | NA | C (WT) | G (Mut) | C (WT) | C (WT) |
|-----|--------|--------|--------|--------|--------|---------|--------|--------|--------|--------|----|----|--------|---------|--------|--------|

**Supplementary Table 5:** Mutation profile of VOC candidates determined by SIRPH analysis.

| ID         | SARS-CoV-2<br>PCR Ct | SNuPE<br>(E484K) | SNuPE<br>(N501Y) | SNuPE<br>(A570D) | SNuPE<br>(D614G) | SNuPE<br>(P681H) | SNuPE<br>(T716I) | SNuPE<br>(V1176F) | VOC     |
|------------|----------------------|------------------|------------------|------------------|------------------|------------------|------------------|-------------------|---------|
| 3004631047 | 15                   | G (WT)           | T (Mut)          | A (Mut)          | G (Mut)          | A (Mut)          | T (Mut)          | NA                | B1.1.7  |
| 3004631647 | 18                   | G (WT)           | T (Mut)          | A (Mut)          | G (Mut)          | A (Mut)          | T (Mut)          | NA                | B1.1.7  |
| 3004627147 | 19                   | G (WT)           | T (Mut)          | A (Mut)          | G (Mut)          | A (Mut)          | T (Mut)          | NA                | B1.1.7  |
| 3004631847 | 23                   | G (WT)           | T (Mut)          | A (Mut)          | G (Mut)          | A (Mut)          | T (Mut)          | NA                | B1.1.7  |
| 20291038   | 24                   | G (WT)           | T (Mut)          | A (Mut)          | G (Mut)          | A (Mut)          | T (Mut)          | NA                | B1.1.7  |
| 30046507   | 25                   | G (WT)           | T (Mut)          | A (Mut)          | G (Mut)          | A (Mut)          | T (Mut)          | NA                | B1.1.7  |
| 21003884   | 27                   | G (WT)           | T (Mut)          | A (Mut)          | G (Mut)          | A (Mut)          | T (Mut)          | NA                | B1.1.7  |
| 21003581   | 27                   | G (WT)           | T (Mut)          | A (Mut)          | G (Mut)          | A (Mut)          | T (Mut)          | NA                | B1.1.7  |
| 21003582   | 28                   | G (WT)           | T (Mut)          | A (Mut)          | G (Mut)          | A (Mut)          | T (Mut)          | NA                | B1.1.7  |
| 10474388   | 31                   | A (Mut)          | NA               | C (WT)           | G (Mut)          | C (WT)           | C (WT)           | G (WT)            | B.1.351 |
| 10474400   | NA                   | G (WT)           | T (Mut)          | A (Mut)          | G (Mut)          | A (Mut)          | T (Mut)          | NA                | B1.1.7  |
| 10474401   | NA                   | G (WT)           | T (Mut)          | A (Mut)          | G (Mut)          | A (Mut)          | T (Mut)          | NA                | B1.1.7  |

**Supplementary Table 6:** GISAID Identifiers for viral genome sequences. Note that only sequences with high quality (more than 95% genomic coverage with at least 20X) were submitted to GISAID. Consensus sequences with more missing sites but sufficient coverage at the analyzed potentially mutated sites can be found in Sup. Data 1.

|                 |                 |                 |                 |                 |
|-----------------|-----------------|-----------------|-----------------|-----------------|
| EPI_ISL_1091121 | EPI_ISL_1091106 | EPI_ISL_1091114 | EPI_ISL_1091138 | EPI_ISL_1091093 |
| EPI_ISL_1091111 | EPI_ISL_1091120 | EPI_ISL_1091130 | EPI_ISL_1091103 | EPI_ISL_1091129 |
| EPI_ISL_1091122 | EPI_ISL_1091091 | EPI_ISL_1091126 | EPI_ISL_1091109 | EPI_ISL_1091135 |
| EPI_ISL_1091097 | EPI_ISL_1091101 | EPI_ISL_1091118 | EPI_ISL_1091136 | EPI_ISL_1091137 |
| EPI_ISL_1091115 | EPI_ISL_1091127 | EPI_ISL_1091125 | EPI_ISL_1091092 | EPI_ISL_1091100 |
| EPI_ISL_1091146 | EPI_ISL_1091108 | EPI_ISL_1091107 | EPI_ISL_1091098 | EPI_ISL_1091102 |
| EPI_ISL_1091099 | EPI_ISL_1091112 | EPI_ISL_1091140 | EPI_ISL_1091104 | EPI_ISL_1091094 |
| EPI_ISL_1091090 | EPI_ISL_1091096 | EPI_ISL_1091113 | EPI_ISL_1091117 |                 |
